# Supplementary material for: Predicting of Mechanical Ventilation and Outcomes by Using Models and Biomarker in Guillain-Barré Syndrome
Source: Springer Nature journal article supplement (doi:10.1007/s40120-023-00546-w), 2023-10-04
Supplement: MOESM1 [file 26126436]

**Predicting of mechanical ventilation and outcomes by using models and biomarker in Guillain–Barré syndrome**

Jiajia Yao (MD)<sup>1</sup>, Rumeng Zhou (MD)<sup>1</sup>, Yue Liu (MD)<sup>1</sup>, Yin Liu (MD)<sup>1</sup>, Qian Cao (PhD)<sup>1</sup>, Zuneng Lu (PhD)<sup>1\*</sup>

<sup>1</sup> Department of Neurology, Renmin Hospital of Wuhan University, Hubei, China

Supplementary table 1. The Neurophysiological criteria for GBS subtypes

|             |                                                                                                                                                                                                                                                                                                                                                          |
|-------------|----------------------------------------------------------------------------------------------------------------------------------------------------------------------------------------------------------------------------------------------------------------------------------------------------------------------------------------------------------|
| AIDP        | At least one of the following in each of at least two nerves, or at least two of the following in one nerve if all others inexcitable and dCMAP 10% LLN:<br>Motor conduction velocity 90% LLN (85% if dCMAP 50% LLN)<br>Distal motor latency 110% ULN (120% if dCMAP 100% LLN)<br>pCMAP/dCMAP ratio 0.5 and dCMAP 20% LLN<br>F-response latency 120% ULN |
| AMSAN       | None of the features of AIDP except one demyelinating feature allowed in one nerve if dCMAP 10% LLN<br>Sensory action potential amplitudes LLN                                                                                                                                                                                                           |
| AMAN        | None of the features of AIDP except one demyelinating feature allowed in one nerve if dCMAP 10% LLN<br>Sensory action potential amplitudes normal                                                                                                                                                                                                        |
| Inexcitable | dCMAP absent in all nerves or present in only one nerve with dCMAP 10% LLN                                                                                                                                                                                                                                                                               |
| Equivocal   | Not satisfying any of the above sets of conditions                                                                                                                                                                                                                                                                                                       |

AIDP: acute inflammatory demyelinating polyneuropathy; AMAN: acute motor axonal neuropathy; AMSAN: acute motor and sensory axonal neuropathy; dCMAP: compound muscle action potential amplitude after distal stimulation; pCMAP: compound muscle action potential amplitude after proximal stimulation; LLN: lower limit of normal; ULN: upper limit of normal.
